# Supplementary material for: A low-concentration all-fluorinated electrolyte for stable lithium metal batteries
Source: Royal Society of Chemistry journal article supplement (doi:10.1039/d2cc04427g), 2022-01-01
Supplement: d2cc04427g1.pdf [file d2cc04427g1.pdf]

# Supporting Information

## **A low-concentration all-fluorinated electrolyte for stable lithium metal batteries**

Jisheng Mo,<sup>a†</sup> Yiqing Yao,<sup>a†</sup> Chen Li,<sup>a</sup> Hanxu Yang,<sup>a</sup> Haiwen Li,<sup>c</sup> Qingan Zhang,<sup>ab</sup> Zhipeng Jiang<sup>\*ab</sup> and Yongtao Li<sup>\*ab</sup>

<sup>a</sup> School of Materials Science and Engineering & Low-Carbon New Materials Research Center, Anhui University of Technology, Maanshan 243002, China

<sup>b</sup> Key Laboratory of Green Fabrication and Surface Technology of Advanced Metal Materials of Ministry of Education, Anhui University of Technology, Maanshan 243002, China

<sup>c</sup> Hefei General Machinery Research Institute, Hefei 230031, China

<sup>†</sup> These authors contributed equally to this work.

\*Corresponding author.

E-mail: jzp1994@ahut.edu.cn; liyongtao@ahut.edu.cn

## Experimental section

**Materials.** lithium hexafluorophosphate (LiPF<sub>6</sub>, 99.9%), lithium difluorosulfonimide (LiFSI, 99.9%), fluoroethylene carbonate (FEC, 99%), ethylene carbonate (EC, 99%), diethyl carbonate (DEC, 99%) were purchased from Dodo chem. 1,1,2,2-tetrafluoroethyl-2,2,3,3-tetrafluoropropylether (TTE, 99%) was bought from innochem. LiNi<sub>0.6</sub>Co<sub>0.2</sub>Mn<sub>0.2</sub>O<sub>2</sub> (NCM622), and superconducting carbon black conductive agent (Super P) were ordered from the Kelude website. Polyvinylidene fluoride (PVDF) was purchased from Aladdin Technology Co., Ltd. Li foil ( $\varphi$  14 mm, 400  $\mu$ m, China Energy Lithium Co., Ltd.), Cu foil (12  $\mu$ m, Shenzhen Jingliang Copper Industey Co., Ltd.), carbon-coated Al foil (8 + 2  $\mu$ m, Shenzhen Kejing Star Technology Co., Ltd.), separator (Alumina Ceramic Diaphragm 16 + 4  $\mu$ m). Commercial NCM622 electrode were purchased from Guangdong Canrd New Energy Technology Co., Ltd. (20.8 mg cm<sup>-2</sup>). All these materials used without further purification.

**Electrolyte Preparation.** LCAFE was prepared by dissolving 0.5 M LiFSI in 1 ml mixed solvent of FEC and TTE with the volume ratio of 1: 1. The convention carbonate electrolyte is 1 M LiPF<sub>6</sub> in EC/DEC (v/v = 1: 1). Besides, 0.5 M LiFSI in pure FEC, and 1 M LiFSI in pure FEC were prepared as the control groups.

**Characterizations.** Raman spectra were obtained using HORIBA LabRAM HR Evolution. Conductivity was obtained using DDS-307A. Disassemble the cycled Li-Cu cells, the Cu foil was washed with DEC and dried in an Ar-atmosphere glovebox. NANO SEM430 field emission SEM system was employed to observe the morphologies of the deposited Li. XPS was conducted with Thermo Fisher Scientific K-Alpha. The Li-NCM622 cells were charged to 4.3 V and then dissembled. The cathode was washed with DEC and dried in an Ar-atmosphere glovebox. To characterize the CEI formed after cycling, transmission electron microscopes were obtained using F200X. The contact angle was measured using JY-82B Kruss DSA.

**Electrochemical Tests.** Li-Cu, Li-NCM622 and Cu-NCM622 cells were fabricated in CR2032-type coin cells with 40  $\mu$ L of electrolyte for electrochemical tests. The electrochemical performance of the CR2032-type coin cells was conducted on the LANHE CT3002A battery test instrument at 25 °C. Li-Cu half cells were constructed using a Cu foil ( $\varphi$  16 mm) and a Li foil ( $\varphi$  14 mm, 400  $\mu$ m). The NCM622 cathode was prepared by slurring NCM622 powder, Super P, and PVDF in an 8: 1: 1 weight ratio in NMP solution, and then coating on the carbon-coated Al foil. After overnight drying at 60 °C in a vacuum, electrodes with areal mass loadings of 2~3 mg cm<sup>-2</sup> were obtained. Li-NCM622 cells were assembled by an NCM622 cathode ( $\varphi$  8 mm, 2.5 mg cm<sup>-2</sup>) and a Li foil ( $\varphi$  14 mm, 400  $\mu$ m, 80 mAh cm<sup>-2</sup>) using various electrolytes (40  $\mu$ L) for rate and long-term cycling tests. Cu-NCM622 anode-free cells were assembled by a commercial NCM622 cathode ( $\varphi$  12 mm, 20.8 mg cm<sup>-2</sup>) and Cu foil ( $\varphi$  16 mm) for using various electrolytes (20  $\mu$ L) cycling test. The above Li/Cu-NCM622 cells are galvanostatically cycled between 3 and 4.3 V. Linear sweep voltammetry (LSV) plot was tested by the CHI660E electrochemical workstation with a scan rate of 1 mV s<sup>-1</sup>. Electrochemical impedance spectrometry (EIS) (100 kHz to 0.1 Hz) was conducted using the CHI660E with a voltage amplitude of 5 mV, and the cycled Li-NCM622 cells need to be rested 10 min to obtain a steady voltage before EIS tests.

## Supplementary Figures

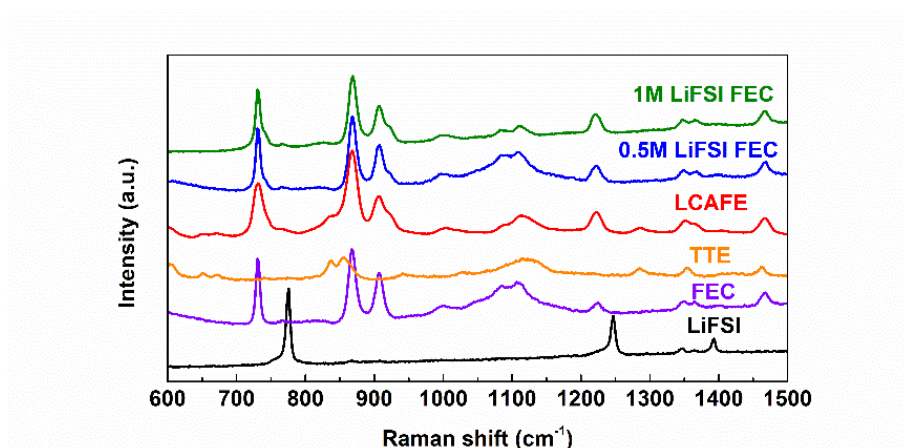

Fig. S1 Raman spectra of various solvent systems.

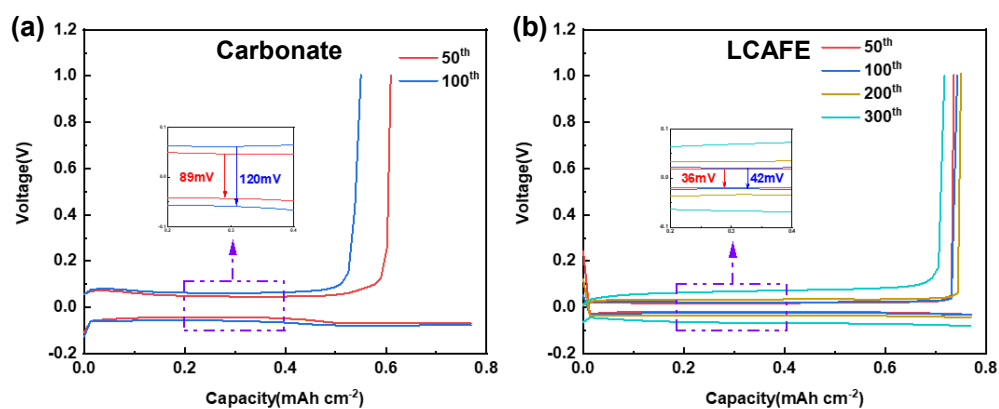

Fig. S2 Voltage response curves of Li-Cu cells in different electrolytes. (a) carbonate electrolyte and (b) LCAFE.

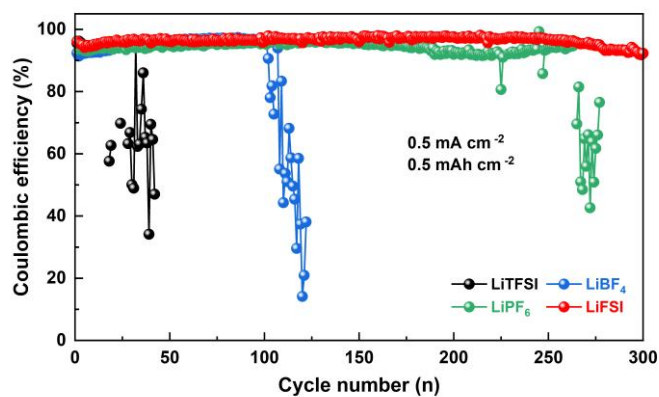

Fig. S3 Li-Cu half cell tests of various LCAFEs with different Li salts.

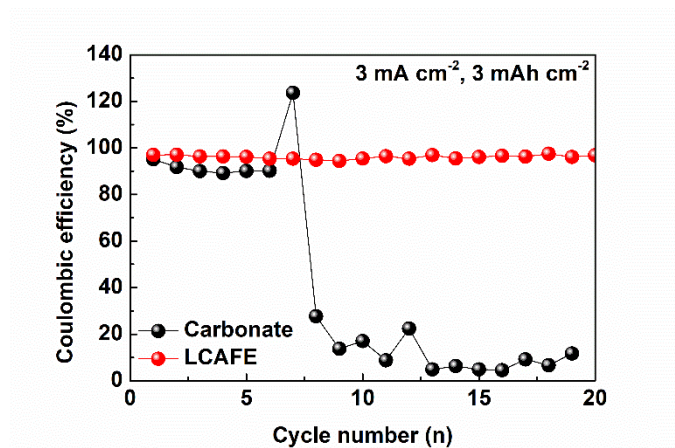

Fig. S4 CE tests using different electrolytes under the conditions of  $3 \text{ mA cm}^{-2}$ ,  $3 \text{ mAh cm}^{-2}$ .

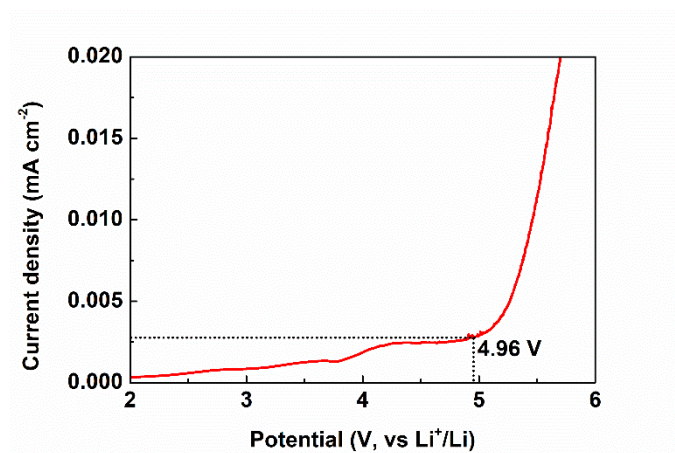

Fig. S5 LSV plot of LCAFE (Scan rate:  $1 \text{ mV s}^{-1}$ ).

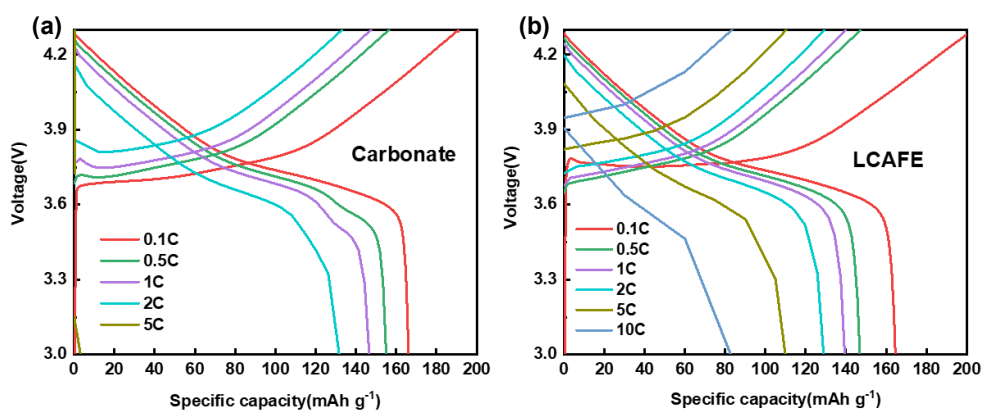

Fig. S6 Charge-discharge curves of rate tests of Li-NCM622 cells using (a) carbonate electrolyte and (b) LCAFE.

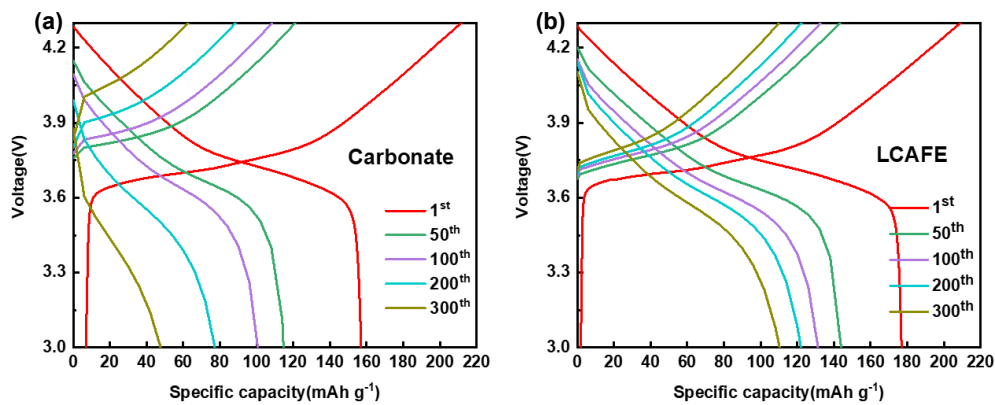

**Fig. S7** Charge-discharge curves of long-term cycling tests of Li-NCM622 cells using (a) carbonate electrolyte and (b) LCAFE.

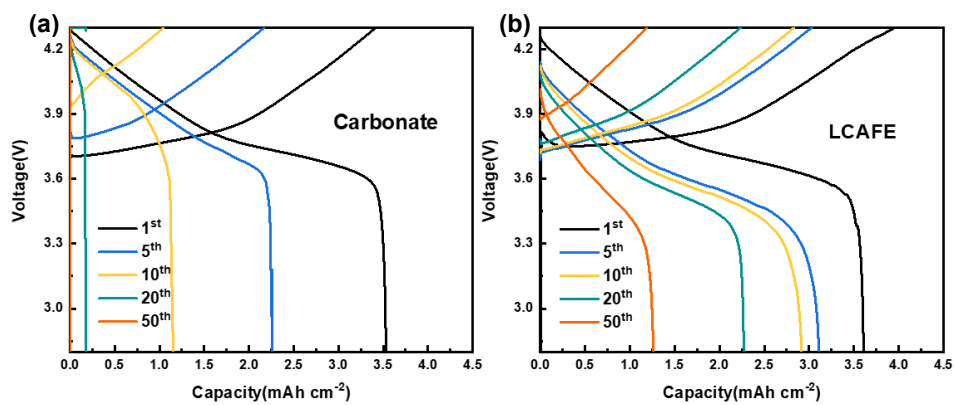

**Fig. S8** Charge-discharge curves of Cu-NCM622 anode-free cell cycling tests using (a) carbonate electrolyte and (b) LCAFE.

## Supplementary Tables

**Table S1.** Comparison of Li<sup>+</sup> conductivity of various electrolytes at room temperature.

| Electrolytes                           | Li <sup>+</sup> conductivity |
|----------------------------------------|------------------------------|
| LCAFE                                  | 3.76 ms cm <sup>-1</sup>     |
| 0.5M LiTFSI in FEC: TTE=1:1            | 2.60 ms cm <sup>-1</sup>     |
| 0.5M LiBF <sub>4</sub> in FEC: TTE=1:1 | 11.60 μs cm <sup>-1</sup>    |
| 0.5M LiFP <sub>6</sub> in FEC: TTE=1:1 | 3.67 ms cm <sup>-1</sup>     |
| 0.5M LiFSI in FEC                      | 4.45 ms cm <sup>-1</sup>     |
| 1M LiFSI in FEC                        | 5.60 ms cm <sup>-1</sup>     |
| Carbonate electrolyte                  | 7.77 ms cm <sup>-1</sup>     |

**Table S2.** Fitted results of the R<sub>e</sub>, R<sub>sei</sub> for Fig 3c-d.

| Electrolyte                 | R <sub>e</sub> (Ω) | R <sub>sei</sub> (Ω) |
|-----------------------------|--------------------|----------------------|
| Carbonate 0 <sup>th</sup>   | 5.194              | 450.806              |
| Carbonate 1 <sup>st</sup>   | 3.848              | 515.952              |
| Carbonate 10 <sup>th</sup>  | 7.211              | 221.389              |
| Carbonate 100 <sup>th</sup> | 4.305              | 54.875               |
| Carbonate 200 <sup>th</sup> | 5.153              | 355.147              |
| LCAFE 0 <sup>th</sup>       | 5.394              | 345.606              |
| LCAFE 1 <sup>st</sup>       | 5.981              | 260.819              |
| LCAFE 10 <sup>th</sup>      | 6.214              | 128.186              |
| LCAFE 100 <sup>th</sup>     | 8.788              | 118.512              |
| LCAFE 200 <sup>th</sup>     | 5.447              | 161.853              |
